# Supplementary material for: A chemically modified solid-state sensor for magnesium(ii) ions and esomeprazole magnesium potentiometric assay
Source: Royal Society of Chemistry journal article supplement (doi:10.1039/d2ra06839g), 2023-01-01
Supplement: d2ra06839g1.pdf [file d2ra06839g1.pdf]

### Electronic Supplementary Material (ESI)

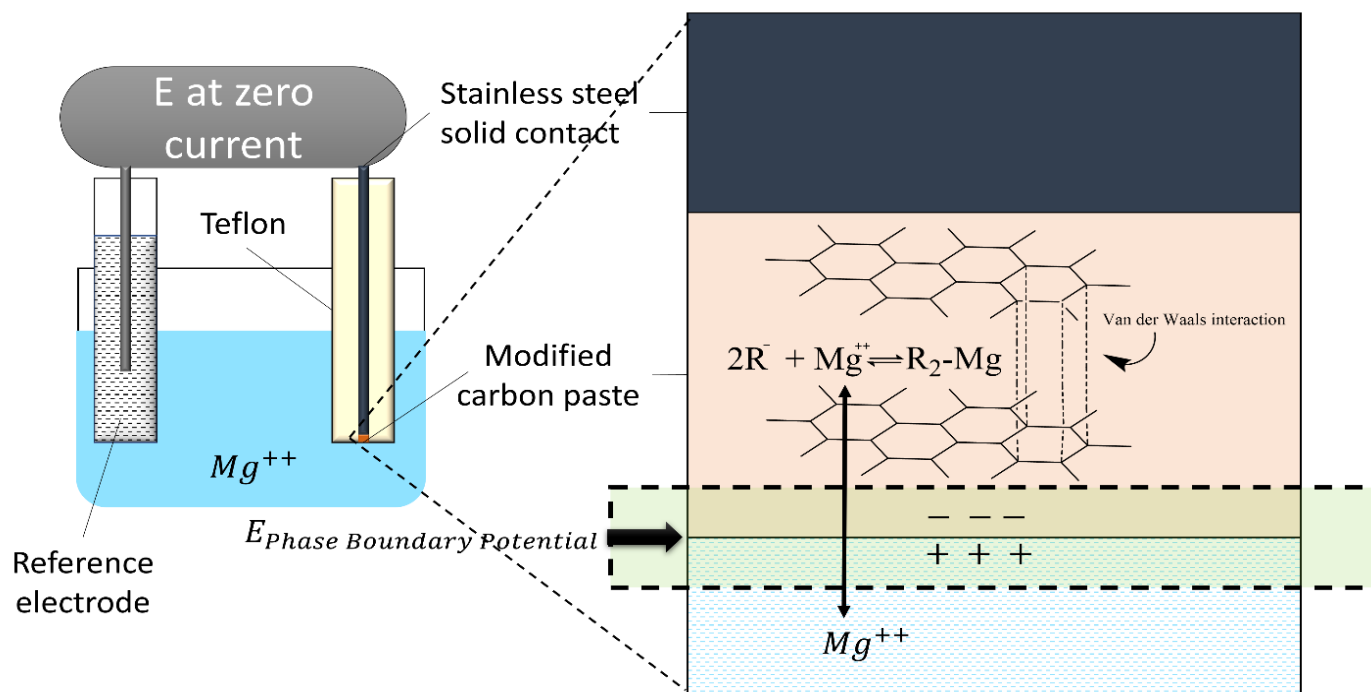

**Fig. S1** Diagram for magnesium(II) ions detection using esomeprazole magnesium carbon paste electrode

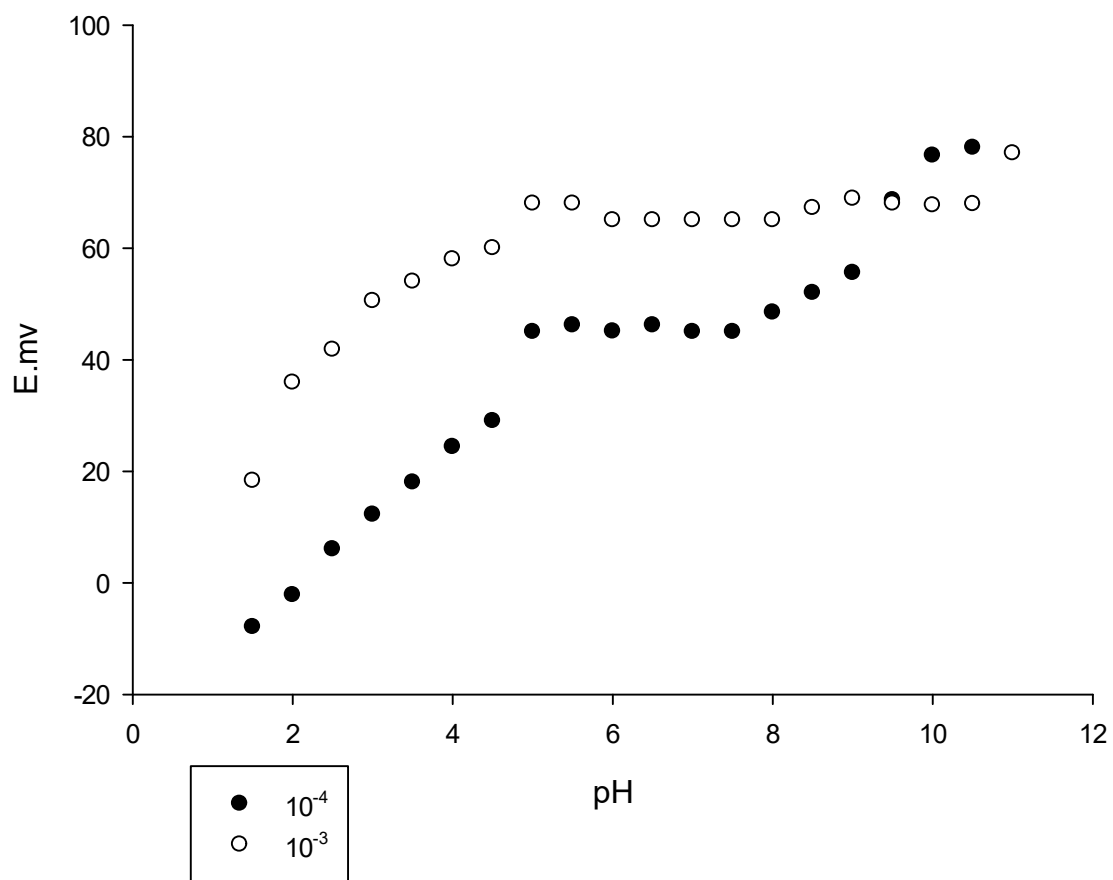

**Fig. S2** Effect of pH on  $1 \times 10^{-3}$  and  $1 \times 10^{-4}$  mol L<sup>-1</sup> Magnesium(II) solutions on the potential response of the esomeprazole-mg sensor

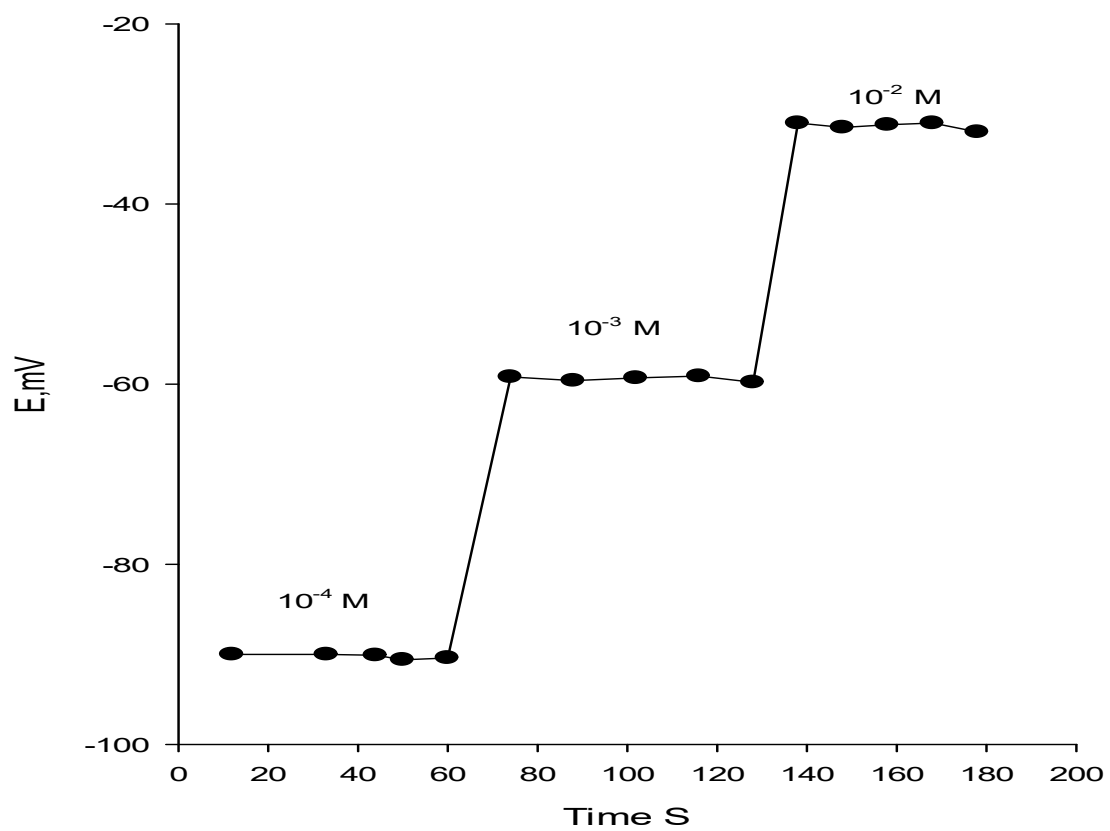

**Fig. S3** Potential-Time response of the esomeprazole magnesium sensor using Magnesium(II) solutions  $1 \times 10^{-4}$  to  $1 \times 10^{-2}$  mol L<sup>-1</sup>

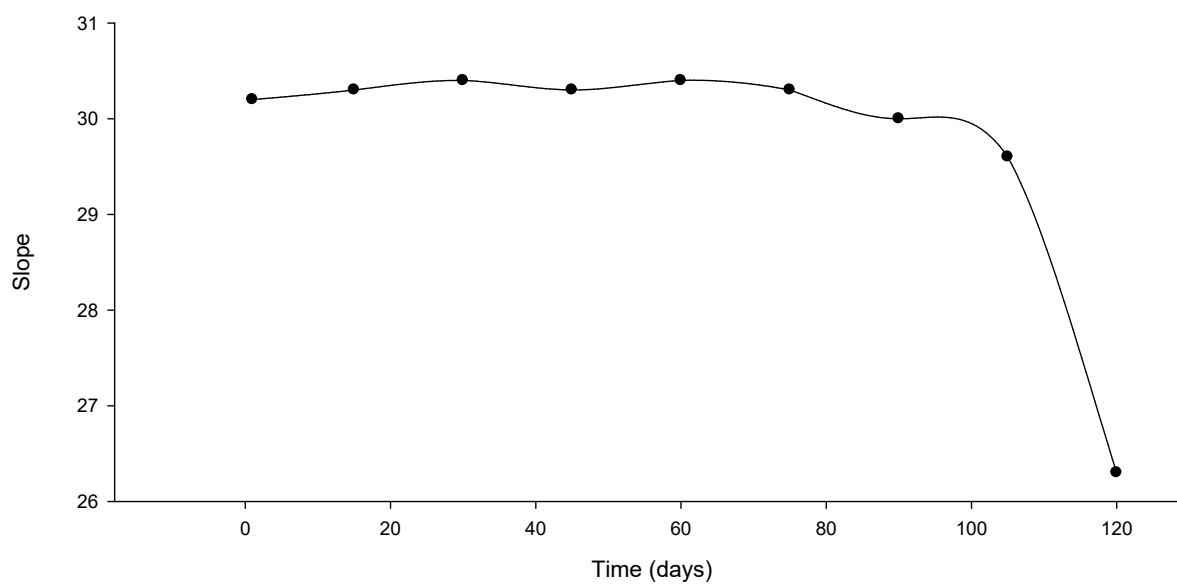

**Fig. S4** Life span of the esomeprazole magnesium sensor

**Table S1** Response characteristics of the optimized sensor<sup>(a)</sup>.

| Parameters                          | Optimized sensor response <sup>(a)</sup>      |
|-------------------------------------|-----------------------------------------------|
| Slope (mV decade <sup>-1</sup> )    | 29.93 ± 0.10                                  |
| Correlation coefficient (r)         | 0.996                                         |
| LOD (mol L <sup>-1</sup> )          | 4.13×10 <sup>-6</sup>                         |
| Linear range (mol L <sup>-1</sup> ) | 1.41×10 <sup>-5</sup> – 1.00×10 <sup>-2</sup> |
| Accuracy (recovery % ± %RSD)        | 100.5±0.39                                    |
| Working pH range                    | 5.0–8.0                                       |
| Response time (s)                   | 8-10                                          |
| Life span (months)                  | 4                                             |

<sup>a)</sup> The sensor consists of 20% esomeprazole mg, 36% graphite, and 44% NOPE.

**Table S2** Selectivity coefficient values for the esomeprazole-mg sensor

| Interfering ions | $\log K_{Mg,j}^{pot}$ |
|------------------|-----------------------|
| Fe <sup>3+</sup> | -4.89                 |
| Zn <sup>2+</sup> | -1.81                 |
| Cr <sup>3+</sup> | -3.06                 |
| Se <sup>6+</sup> | -1.17                 |
| Ni <sup>3+</sup> | -1.26                 |
| Ca <sup>2+</sup> | -2.06                 |
| K <sup>+</sup>   | -1.18                 |
| Na <sup>+</sup>  | -1.18                 |
| Mo <sup>2+</sup> | -2.73                 |
| Cu <sup>2+</sup> | -2.96                 |
| Co <sup>3+</sup> | -3.15                 |
| Na-CMC           | -2.47                 |
| Lactose          | -2.42                 |
| Starch           | -2.39                 |
| MC.Cellulose     | -2.58                 |
| Talc             | -2.18                 |
| Gelatin          | -1.9                  |
| Sucrose          | -3.49                 |
| L-Glutamine      | -2.17                 |
| B-Alanine        | -1.54                 |
| L-Threonine      | -2.69                 |
